# Supplementary material for: Methane emissions and rumen metabolite concentrations in cattle fed two different silages
Source: PubMed Central journal article supplement (PMC8971404; doi:10.1038/s41598-022-09108-w), 2022-03-31
Supplement: 41598_2022_9108_MOESM1_ESM.pdf [file 41598_2022_9108_MOESM1_ESM.pdf]

Supplementary Information for:

**Methane Emissions and Rumen Metabolite  
Concentrations in Cattle Fed Two Different Silages.**

R. Bica<sup>1,2,7\*</sup>, J. Palarea-Albaladejo<sup>3,6</sup>, J. Lima<sup>1,2</sup>, D. Uhrin<sup>4</sup>,  
G.A. Miller<sup>1</sup>, J.M. Bowen<sup>1</sup>, D. Pacheco<sup>5</sup>, A. Macrae<sup>2</sup>, R.J.  
Dewhurst<sup>1</sup>

Riccardo Bica

Email: [Riccardo.bica@sruc.ac.uk](mailto:Riccardo.bica@sruc.ac.uk)

**This PDF file includes:**

Supplementary Figure 1S

Supplementary Table 1S

Extra References

| Parameter                  | Value                                                                                |
|----------------------------|--------------------------------------------------------------------------------------|
| 1 Data File Name           | D:/ 2D_experiments_old_new/ 19/ pdata/ 1/ 2rr                                        |
| 2 Title                    | 2D_experiments_old_new_19.1.2rr                                                      |
| 3 Comment                  | echo/ antiecho edited HSQC w/ sensitivity improvement w/ adiabatic blevel decoupling |
| 4 Origin                   | Bruker BioSpin GmbH                                                                  |
| 5 Owner                    | chemist                                                                              |
| 6 Site                     |                                                                                      |
| 7 Instrument               | Neo800                                                                               |
| 8 Author                   |                                                                                      |
| 9 Solvent                  | H2O+D2O                                                                              |
| 10 Temperature             | 298.0                                                                                |
| 11 Pulse Sequence          | hsqcetgpgpsip2.3                                                                     |
| 12 Experiment              | HSQC-EDITED                                                                          |
| 13 Probe                   | Z168389_0002 (CP2.1 TCI 80056 H-C/ N-D-05 2.XT)                                      |
| 14 Number of Scans         | 48                                                                                   |
| 15 Receiver Gain           | 64.0                                                                                 |
| 16 Relaxation Delay        | 1.5000                                                                               |
| 17 Pulse Width             | 12.3200                                                                              |
| 18 Presaturation Frequency |                                                                                      |
| 19 Acquisition Time        | 0.1065                                                                               |
| 20 Acquisition Date        | 2020-01-19T15:27:43                                                                  |
| 21 Modification Date       | 2020-01-19T15:27:32                                                                  |
| 22 Class                   |                                                                                      |
| 23 Spectrometer Frequency  | (799.57, 201.07)                                                                     |
| 24 Spectral Width          | (9615.4, 33181.3)                                                                    |
| 25 Lowest Frequency        | (-968.2, -956.4)                                                                     |
| 26 Nucleus                 | (1H, 13C)                                                                            |
| 27 Acquired Size           | (1024, 1024)                                                                         |
| 28 Spectral Size           | (4096, 2048)                                                                         |
| 29 Digital Resolution      | (2.35, 16.20)                                                                        |

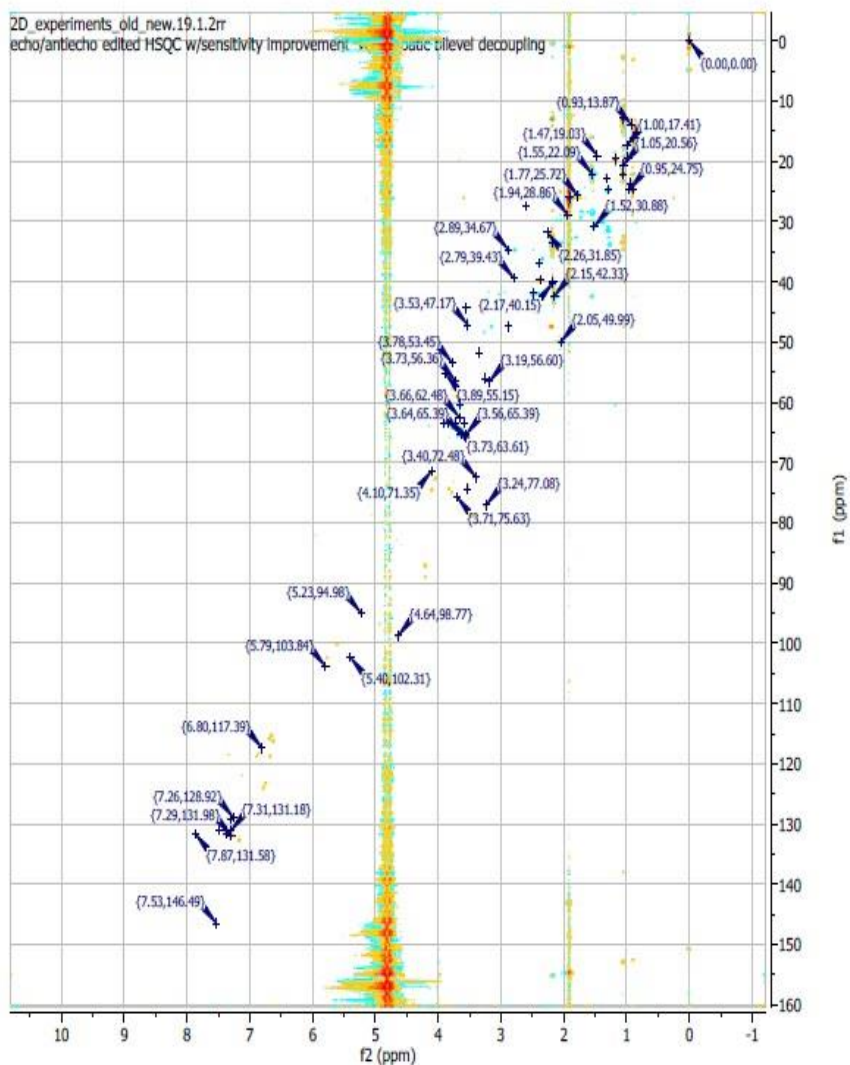

**Supplementary Figure 1S.** 2D HSQC spectra with the  $^1\text{H}$  and  $^{13}\text{C}$  chemical shifts of the identified metabolites

**Supplementary Table 1S.** Metabolites identified by 2D  $^1\text{H}$ - $^{13}\text{C}$  HSQC and  $^1\text{H}$ - $^1\text{H}$  TOSCY spectra and their respective  $^1\text{H}$  and  $^{13}\text{C}$  chemical shifts and their RANCM Rank (Joesten and Kennedy, 2019)<sup>(1)</sup>

| Compound           | HMDB $^1\text{H}$ and $^{13}\text{C}$ Chemical Shifts                                                | 2D HSQC/TOSCY $^1\text{H}$ and $^{13}\text{C}$ Chemical Shifts                                       | COLMARM $^1\text{H}$ and $^{13}\text{C}$ Chemical Shifts                  | RANCM Rank |
|--------------------|------------------------------------------------------------------------------------------------------|------------------------------------------------------------------------------------------------------|---------------------------------------------------------------------------|------------|
| 1. Acetate         | 1.90/26.08                                                                                           | 1.91/26.04                                                                                           | 1.90/25.99                                                                | 3S         |
| 2. Butyrate        | 2.14/42.34,<br>1.54/22.07,<br>0.91/15.91                                                             | 2.15/42.33,<br>1.55/22.09,<br>0.88/15.96                                                             | 2.14/42.33,<br>1.55/22.08,<br>0.88/15.93                                  | 3          |
| 3. Propionate      | 2.16/33.48,<br>1.03/12.98                                                                            | 2.17/33.46,<br>1.04/12.90                                                                            | 2.17/33.41,<br>1.04/12.89                                                 | 3          |
| 4. Methanol        | 3.37/51.43                                                                                           | 3.35/51.76                                                                                           | 3.34/51.57                                                                | 3S         |
| 5. Isobutyrate     | 1.04/22.00,<br>2.37/39.57                                                                            | 1.05/22.09,<br>2.38/39.67                                                                            | 1.05/22.10,<br>2.37/39.67                                                 | 3S         |
| 6. Ethanol         | 1.17/19.59,<br>3.64/60.30                                                                            | 1.17/19.59,<br>3.65/60.30                                                                            | 1.17/19.49,<br>3.64/60.13                                                 | 3          |
| 7. Isovalerate     | 0.89/24.67,<br>1.93/28.84,<br>2.03/49.90                                                             | 0.90/24.67,<br>1.94/28.86,<br>2.05/49.99                                                             | 0.90/24.59,<br>1.94/28.89,<br>2.04/49.94                                  | 3          |
| 8. Leucine         | 0.94/23.57,<br>0.95/24.79,<br>1.70/26.77,<br>1.70/42.59,<br>3.74/56.21                               | 0.95/23.62,<br>0.95/24.75,<br>No peak,<br>No peak,<br>3.73/56.36                                     | 0.94/23.59,<br>0.96/24.75,<br>1.70/26.87,<br>1.70/42.53,<br>3.72/56.11    | 3          |
| 9. Uracil          | 5.79/103.71,<br>7.48/146.25,<br>7.56/146.25                                                          | 5.79/103.84,<br>7.53/146.49,<br>No shift                                                             | 5.79/103.80,<br>7.53/146.26,<br>No shift                                  | 3          |
| 10. 3-PP           | 2.48/41.87,<br>2.87/34.56,<br>7.25/128.79,<br>7.30/131.04,<br>7.35/131.16                            | 2.48/41.92,<br>2.89/34.67,<br>7.26/128.92,<br>7.31/131.18,<br>7.36/131.10                            | 2.48/41.87,<br>2.88/34.56,<br>7.26/128.79,<br>7.30/131.04,<br>7.36/131.16 | 3          |
| 11. Alanine        | 1.49/19.02,<br>3.77/53.55                                                                            | 1.47/19.03,<br>3.78/53.45                                                                            | 1.47/18.87,<br>3.77/53.22                                                 | 3          |
| 12. Phenylacetate  | 3.52/47.17,<br>7.29/131.85,<br>7.29/129.15,<br>7.37/131.51                                           | 3.53/47.17<br>7.29/131.98<br>7.30/129.24<br>7.36/131.50                                              | 3.52/47.17<br>7.29/129.16<br>7.29/131.89<br>7.37/131.37                   | 3          |
| 13. Glucose        | 3.23/76.95,<br>3.39/72.34,<br>3.52/74.19,<br>3.73/63.35,<br>3.89/63.47,<br>4.63/98.71,<br>5.22/94.93 | 3.24/77.08,<br>3.340/72.48,<br>3.53/74.34,<br>3.73/63.61,<br>3.90/63.53<br>4.64/98.77,<br>5.23/94.97 | N.A,<br>N.A,<br>N.A,<br>N.A,<br>N.A<br>4.64/98.64,<br>5.22/94.83          | 3          |
| 14. Glutamate      | 1.77/25.65,<br>2.17/39.90                                                                            | 1.77/25.72,<br>2.17/39.91                                                                            | 1.78/25.72,<br>2.17/40.05                                                 | 3          |
| 15. Valine         | 0.97/19.40,<br>1.03/20.75,<br>2.25/31.89,<br>3.59/63.35                                              | 0.98/19.35,<br>1.04/20.56,<br>2.26/31.85,<br>3.58/63.37                                              | 0.90/19.37,<br>1.03/20.70,<br>2.27/31.83,<br>3.60/63.08                   | 3          |
| 16. Valerate       | 0.84/15.82,<br>0.90/15.82,<br>1.28/24.62,<br>1.51/30.77,<br>2.16/40.06                               | 0.85/15.40,<br>Peak overlap,<br>1.29/24.75,<br>1.52/30.88,<br>2.17/40.15                             | 0.88/15.89,<br>No peak,<br>1.29/24.75,<br>1.51/30.85,<br>2.17/40.12       | 3          |
| 17. Methylamine    | 2.59/27.60                                                                                           | 2.59/27.49                                                                                           | N.A                                                                       | 3S         |
| 18. Trimethylamine | 2.88/47.47                                                                                           | 2.88/47.41                                                                                           | N.A                                                                       | 3S         |
| 19. Succinate      | 2.38/36.82                                                                                           | 2.40/36.85                                                                                           | N.A                                                                       | 3S         |
| 20. Isoleucine     | 0.92/13.91,<br>0.99/17.36,<br>1.45/26.99,<br>1.96/38.68,<br>3.65/62.52                               | 0.93/13.87,<br>1.00/17.41,<br>No peak,<br>No peak,<br>3.66/62.48                                     | N.A                                                                       | 3          |
| 21. Lactate        | 1.31/22.90,<br>4.10/71.37                                                                            | 1.32/22.90,<br>4.10/71.35                                                                            | N.A                                                                       | 3          |
| 22. Glycine        | 3.54/44.30                                                                                           | 3.55/44.34                                                                                           | N.A                                                                       | 3S         |
| 23. Maltose        | 3.57/74.38,<br>3.58/77.25,<br>3.62/79.41,<br>3.67/75.67,<br>3.71/75.44,                              | No peak,<br>No peak,<br>No peak,<br>No peak,<br>3.70/75.63,                                          | N.A                                                                       | 1          |

|                            |                                                                                                      |                                                                                       |     |     |
|----------------------------|------------------------------------------------------------------------------------------------------|---------------------------------------------------------------------------------------|-----|-----|
|                            | 3.80/63.29,<br>3.83/63.23,<br>4.64/98.50,<br>5.22/94.64,<br>5.39/102.28                              | No peak,<br>3.83/63.45,<br>Peak overlap,<br>Peak overlap,<br>5.40/102.31              |     |     |
| 24. Benzoate               | 7.47/130.97<br>7.86/131.44<br>7.64/133.95                                                            | 7.47/131.10,<br>7.87/131.58,<br>No peak                                               | N.A | 2   |
| 25. Aspartate              | 2.71/39.33,<br>2.80/39.47,<br>3.90/55.08                                                             | No peak,<br>2.79/39.43,<br>3.89/55.15                                                 | N.A | 2   |
| 26. Dimethylamine          | 2.71/37.29                                                                                           | N.A                                                                                   | N.A | 1S  |
| 27. 2-Hydroxyvalerate      | N.A                                                                                                  | N.A                                                                                   | N.A | N.A |
| 28. Creatinine             | 3.03/32.97,<br>4.05/59.23                                                                            | N.A                                                                                   | N.A | 1   |
| 29. Xanthine               | 7.92/140.43                                                                                          | N.A                                                                                   | N.A | 1S  |
| 30. Formate                | 8.39/172.41                                                                                          | N.A                                                                                   | N.A | 1S  |
| 31. Acetoacetate           | 2.27/32.24,<br>3.43/56.18                                                                            | N.A                                                                                   | N.A | 1   |
| 32. 1,3-Dihydroxyacetone   | 4.40/67.49                                                                                           | N.A                                                                                   | N.A | 1S  |
| 33. Alloisoleucine         | 0.88/16.00,<br>0.95/13.81,<br>0.96/16.05,<br>1.33/28.08,<br>1.42/28.18,<br>2.05/38.32,<br>3.73/61.39 | N.A                                                                                   | N.A | 1   |
| 34. Caffeine               | 3.41/27.99,<br>3.59/29.61,<br>3.99/33.73,<br>7.50/141.41                                             | N.A                                                                                   | N.A | 1   |
| 35. Malonate               | 3.11/50.23                                                                                           | N.A                                                                                   | N.A | 1S  |
| 36. Choline                | 3.18/56.69,<br>3.50/70.14,<br>4.05/58.49                                                             | 3.19/56.60,<br>No peak,<br>No peak,                                                   | N.A | 1   |
| 37. Betaine                | 3.25/55.85,<br>3.88/68.64                                                                            | 3.25/56.03,<br>No peak                                                                | N.A | 1   |
| 38. Creatine               | 3.02/39.50,<br>3.91/56.43                                                                            | N.A                                                                                   | N.A | 1   |
| 39. Fumarate               | 6.50/138.00                                                                                          | N.A                                                                                   | N.A | 1S  |
| 40. Acetamide              | 2.00/22.11                                                                                           | N.A                                                                                   | N.A | 1S  |
| 41. 3-Hydroxyphenylacetate | 3.46/47.00,<br>6.78/116.16,<br>6.78/118.81,<br>6.84/124.10,<br>7.24/132.64                           | No peak,<br>6.80/117.39,<br>Peak overlap,<br>No peak,<br>No peak                      | N.A | 1   |
| 42. Fructose               | 3.55/66.83,<br>3.54/65.41,<br>3.66/65.59,<br>3.78/70.42,<br>3.88/72.53,<br>3.98/72.14,<br>4.10/77.42 | No peak,<br>3.56/65.39,<br>3.64/65.34,<br>No peak,<br>No peak,<br>No peak,<br>No peak | N.A | 1   |

## Extra References

1. Joesten, W. C. & Kennedy, M. A. RANCM: a new ranking scheme for assigning confidence levels to metabolite assignments in NMR-based metabolomics studies. *Metabolomics*. **15**(1) doi: 10.1007/s11306-018-1465-2 (2019).
